# Supplementary material for: Interaction between Discs large and Pins/LGN/GPSM2: a comparison across species
Source: PubMed Central journal article supplement (PMC8576264; doi:10.1242/bio.058982), 2021-11-03
Supplement: biolopen-10-058982-s1.pdf [file biolopen-10-058982-s1.pdf]

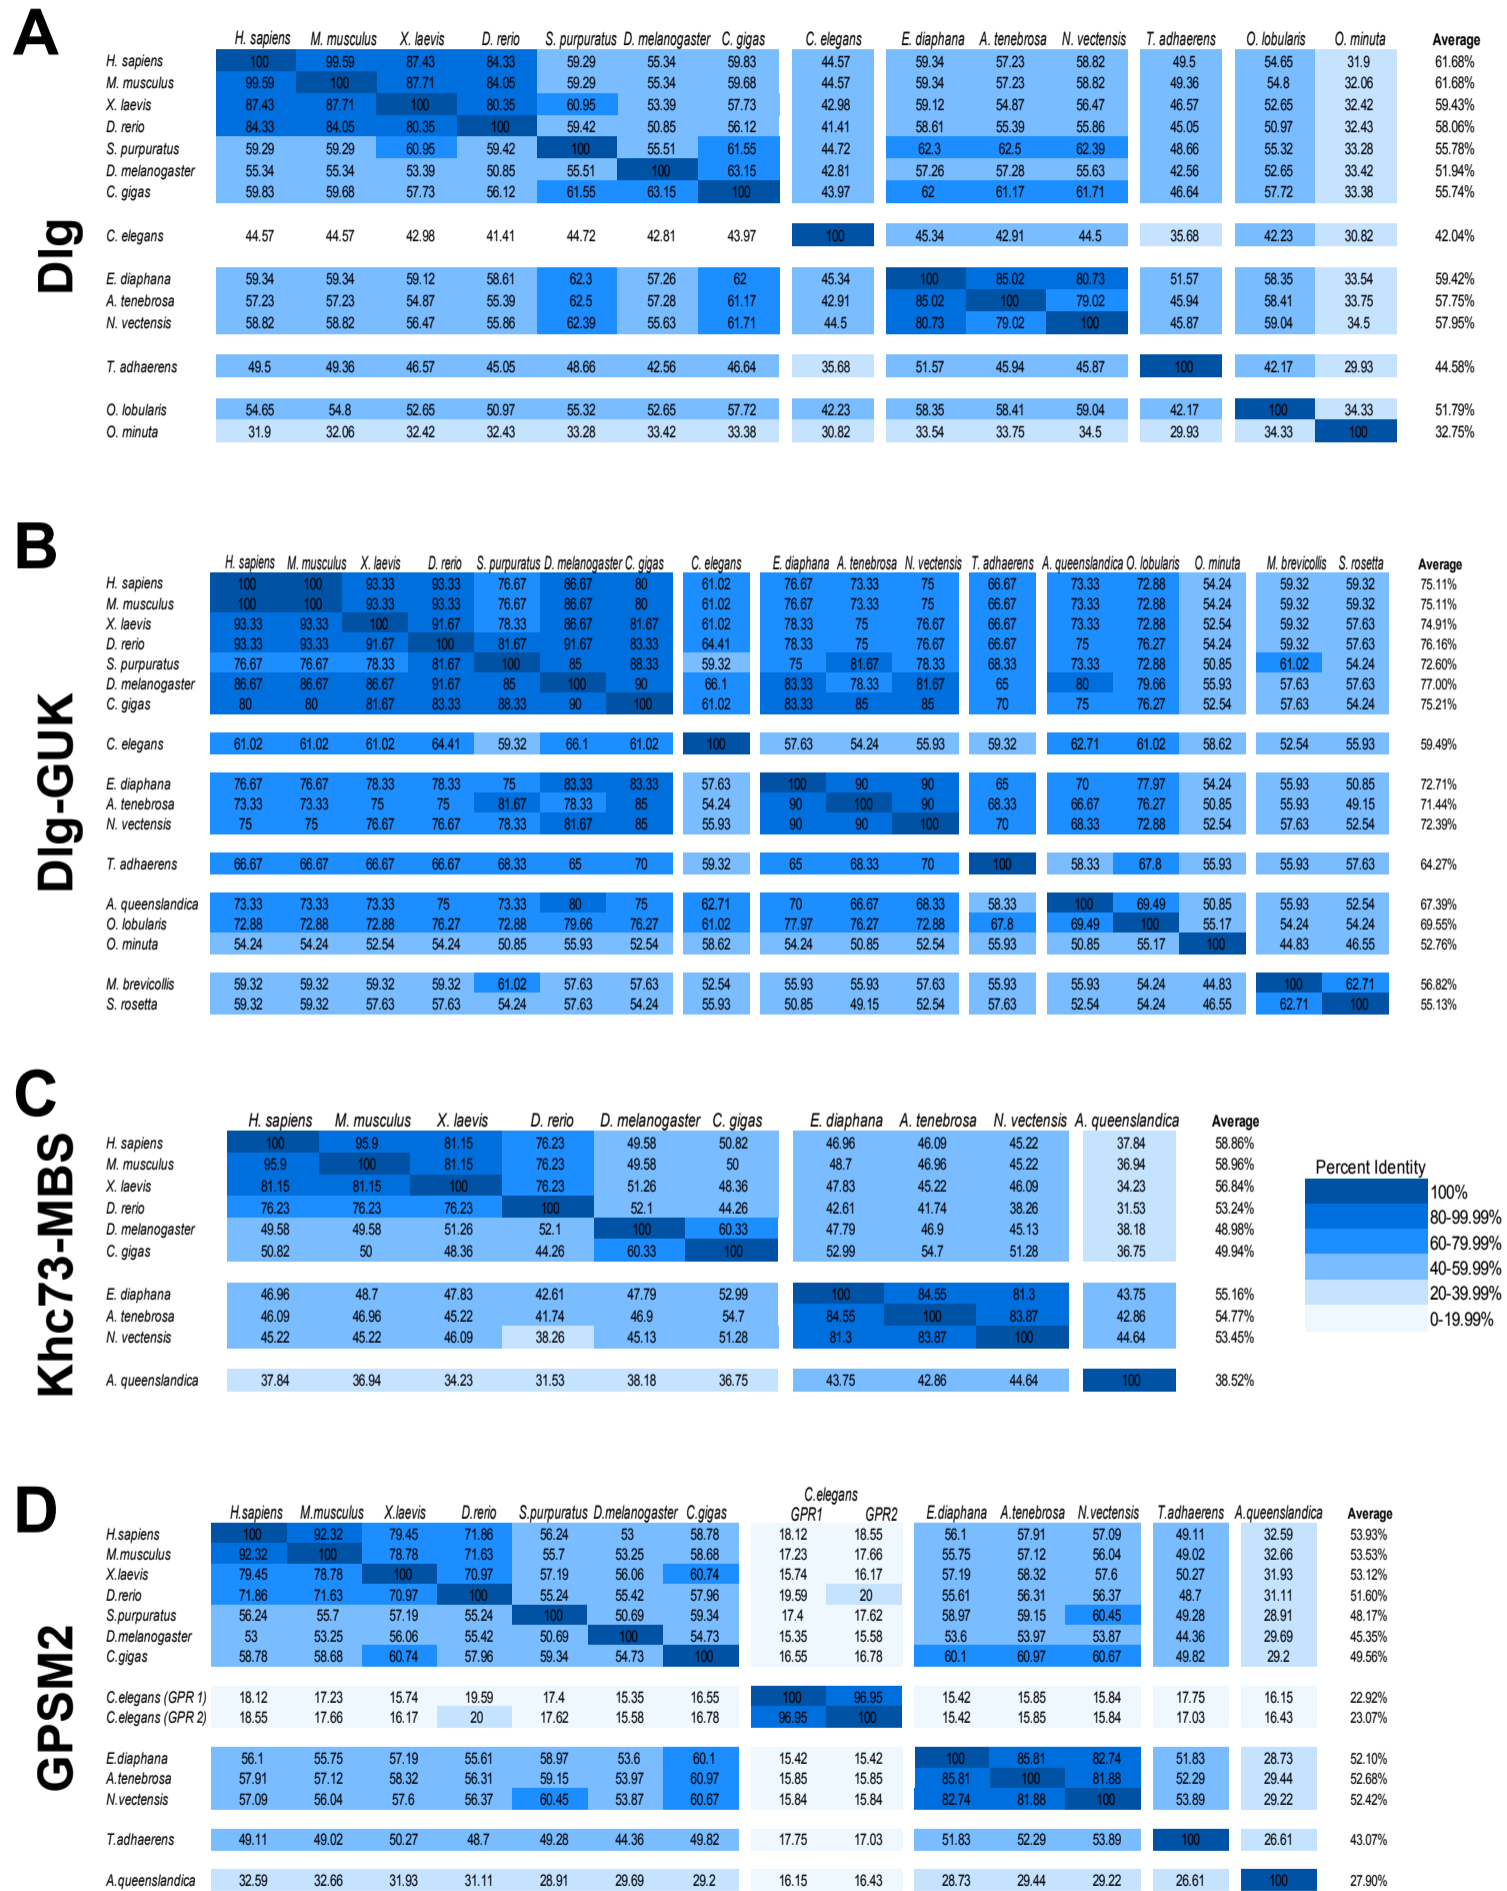

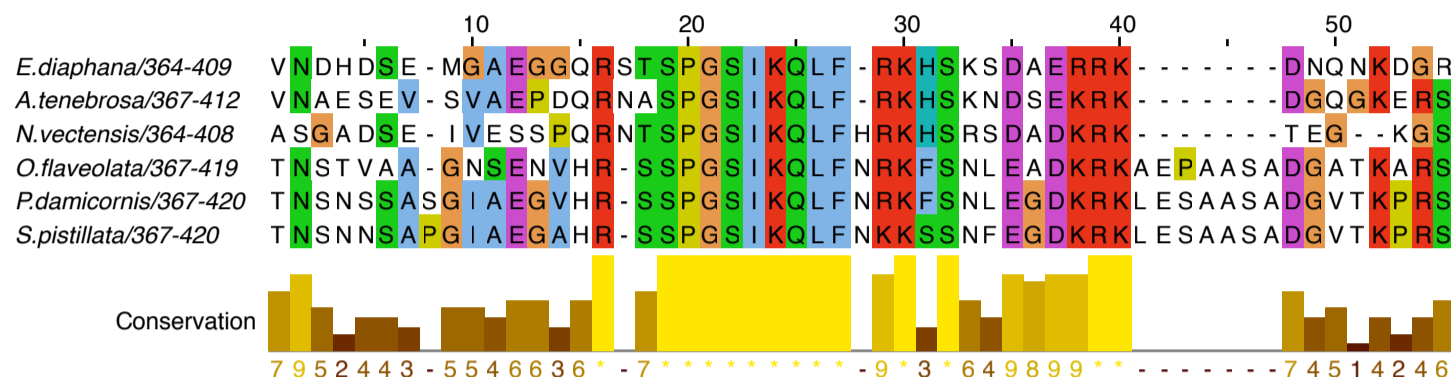

**Fig. S2. The Cnidarian Pins/LGN/GPSM2 linker.** Sequence alignment at the Pins/LGN/GPSM2 linker region in Cnidaria. Alignment is colored using ClustalX color scheme. Figure is adapted from Jalview 2 (Waterhouse et al., 2009).

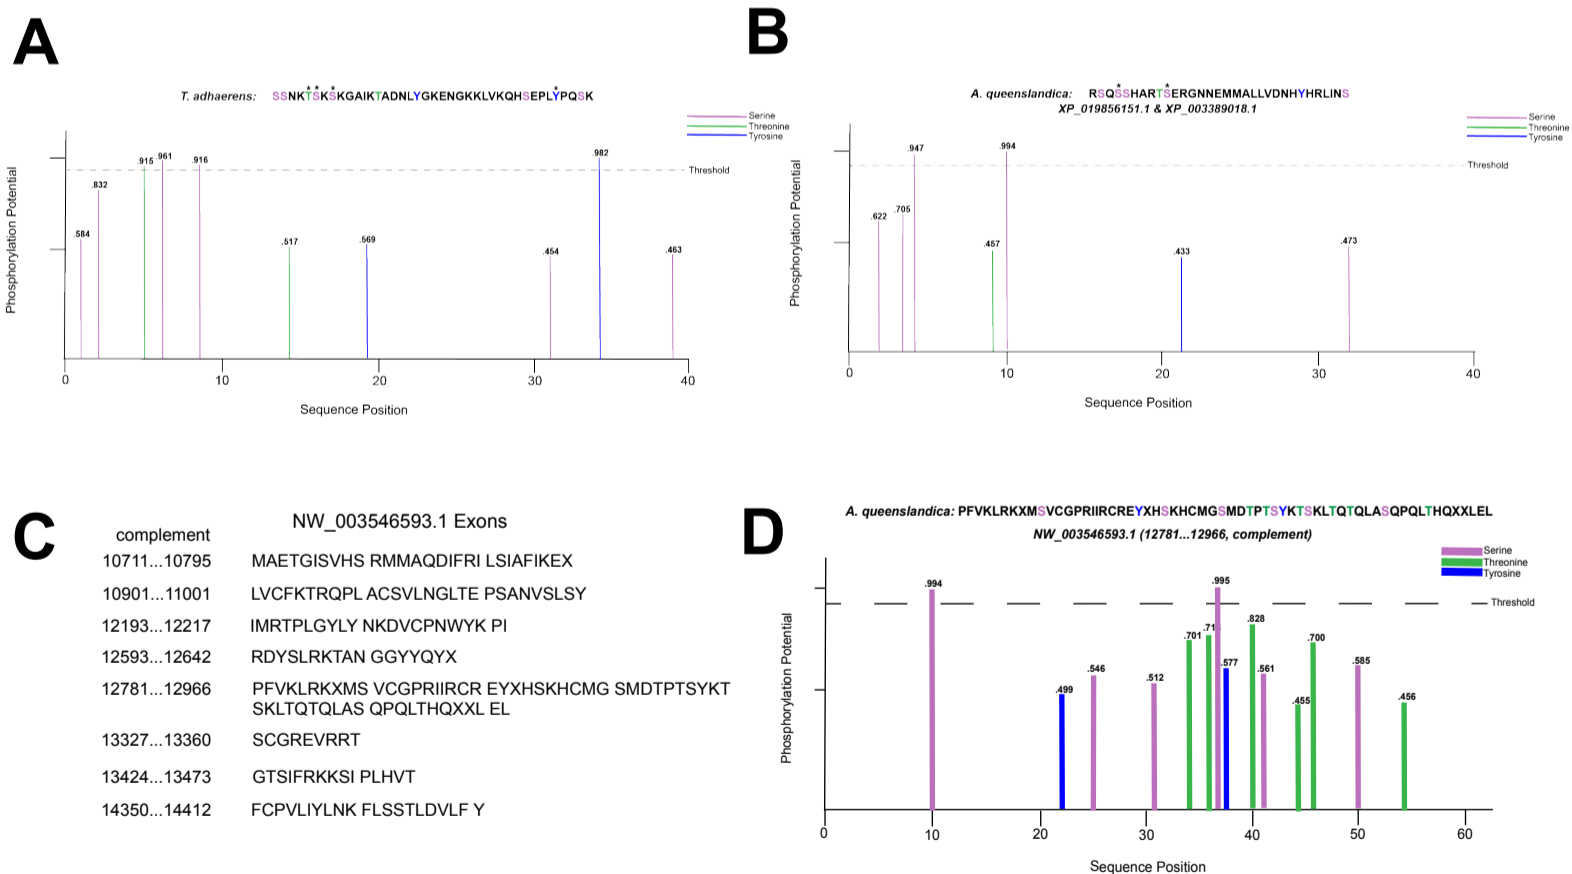

**Fig. S3. Phosphorylation site predictions.** Predicted phosphorylation potential of **A)** *T. adhaerens* (Placozoa) and **B)** *A. queenslandica* (Porifera) Pins/LGN/GPSM2 linker regions. Asterisks indicate the residues that are predicted to be a phosphorylation site with greater than 90% confidence. Graphs are adapted from NetPhos 3.1 (Blom et al., 1999). **C)** Reverse translated nucleotide sequences of eight regions with high exon character between NW\_003546593.1 (14479...19908, complement) and NW\_003546593.1 (9550...10710, complement). **D)** Of the eight potential exons identified, only one had predicted phosphorylation sites.
